# Supplementary material for: Identification and Expression Profiling of Two Saudi Arabia Catalase Genes from Wheat and Barley in Response to Abiotic and Hormonal Stresses
Source: MDPI journal article supplement (doi:10.3390/antiox11112208), 2022-11-08
Supplement: s1 [file s1]

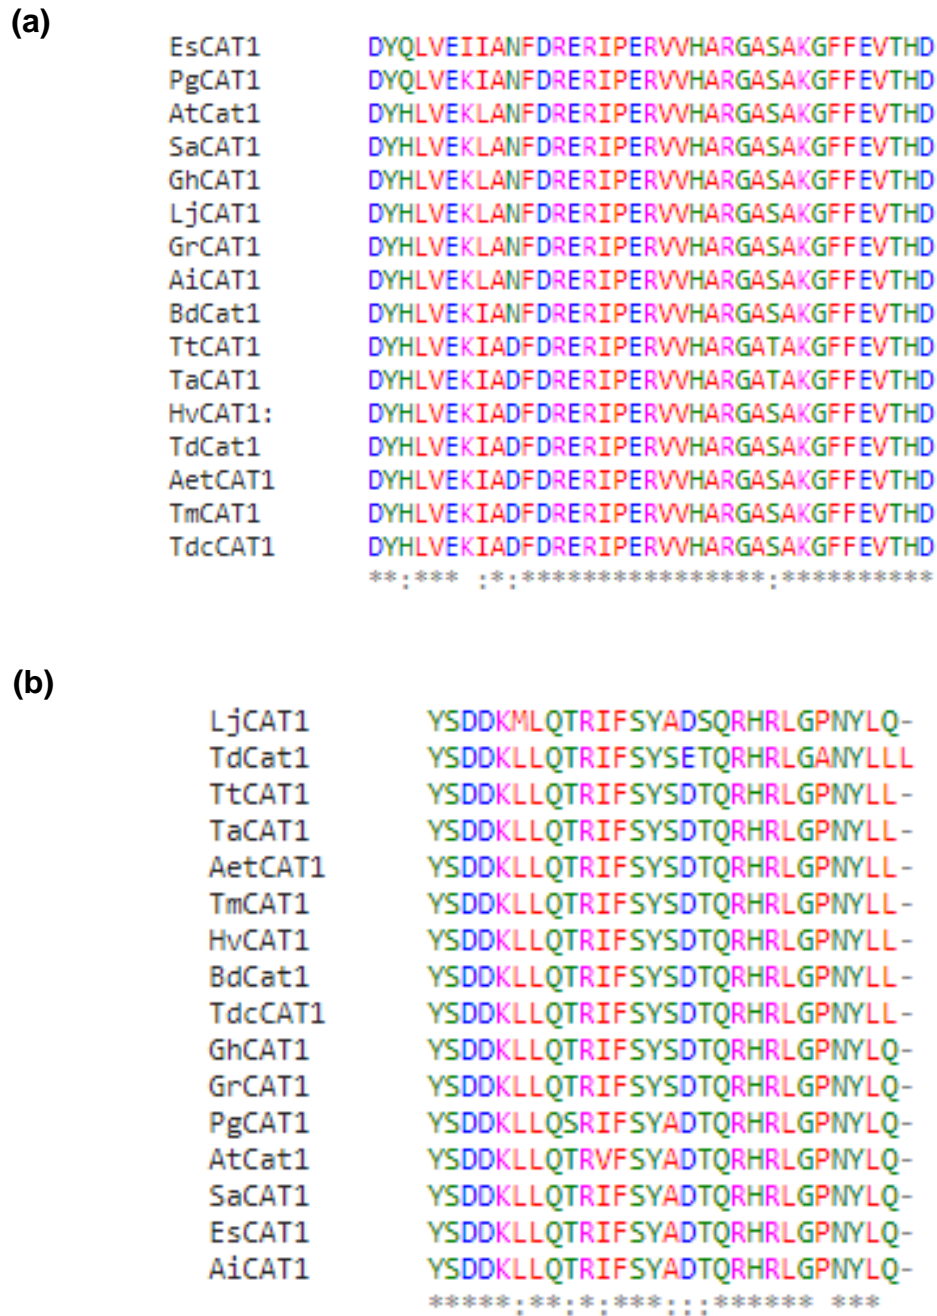

**Figure S1:** Protein sequence alignment of Catalase proximal active site signature domain (a) and Catalase proximal heme-ligand signature (b) of TtCAT1 with other plant catalase proteins using clusterW database.

SeqID: HvCAT1:

CELLO predictor:

Localization  
Prediction

| Localization       | Score        |
|--------------------|--------------|
| Extracellular      | 0.079        |
| Plasmamembrane     | 0.032        |
| Cytoplasmic        | 0.243        |
| Cytoskeletal       | 0.021        |
| ER                 | 0.042        |
| Golgi              | 0.013        |
| Lysosomal          | 0.037        |
| Mitochondrial      | 0.362        |
| Chloroplast        | 0.115        |
| <b>Peroxisomal</b> | <b>3.893</b> |
| Vacuole            | 0.021        |
| Nuclear            | 0.143        |

Localization Probability

- Chloroplast
- Peroxisomal
- Vacuole
- Nuclear

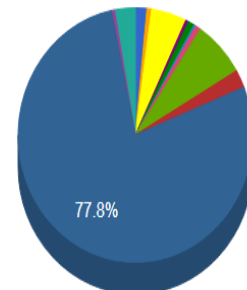

▲ 2/2 ▼

SeqID: TtCAT1

CELLO predictor:

Localization  
Prediction

| Localization       | Score        |
|--------------------|--------------|
| Extracellular      | 0.080        |
| Plasmamembrane     | 0.057        |
| Cytoplasmic        | 0.348        |
| Cytoskeletal       | 0.022        |
| ER                 | 0.062        |
| Golgi              | 0.014        |
| Lysosomal          | 0.043        |
| Mitochondrial      | 0.348        |
| Chloroplast        | 0.129        |
| <b>Peroxisomal</b> | <b>3.735</b> |
| Vacuole            | 0.024        |
| Nuclear            | 0.136        |

Localization Probability

- Chloroplast
- Peroxisomal
- Vacuole
- Nuclear

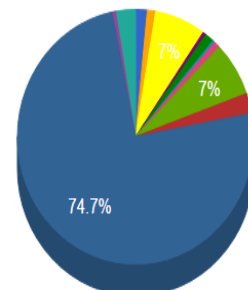

▲ 2/2 ▼

**Figure S2:** In silico localization of (a) HvCAT1 and (b) TtCAT1 proteins.

(a)

```
MDPYKYRPSSSFNAPMWSNAGAPVWNNNSLTVGSRGPILLEDYHLVEK # 50
IADFDRERIPERVVHARGATAKGF FEVTHDVSHLT CADFLRAPGVQTPVI # 100
VRFSTVIHERGSPETLRDPGRFAIKFYTREGNWDLVGNFPVFFIRDMK # 150
FPMVHALKPNPKTHIQENWRILDFFSHPESLHMFTFLFDDIGVPADYR # 200
HMDGSGVNTYTLVNRAGKAHYVKFHWKPTCGVKSLLLEEAVTVGGTNHSH # 250
ATKDLTDSIAAGNYPEWTFYIQTIDPDYEERDFDPLDVTWPEDEVVPL # 300
QPVGRLVLRNIDNFFSENEQLAFCPGIIVPGVYSDDKLLQTRIFSYSD # 350
TQRHRLGPNYLLPANAPKCSHHNNHYDGLMNFMRDEEVDYFPSRFDPA # 400
KHAPRYPIPSRTLNGRREKMWIEKENNFQKPGERYRSMQPARQERFINRW # 450
IDALSDPRLTHEIKAIWLSYWSQADKSLGQKLASRLSSKPSM # 500
%1 ...Y...SSS.....T.....S.T..... # 50
%1 .....T.....T.....T... # 100
%1 ...S.....S.T..... # 150
%1 .....S..... # 200
%1 ...S.....Y.....T...S..... # 250
%1 .T...T.....Y..T...Y.....T... # 300
%1 .....S.....T...S... # 350
%1 T.....Y..... # 400
%1 ...Y.....Y.S..... # 450
%1 ...S...T.....S.S...S.....S.SS....
```

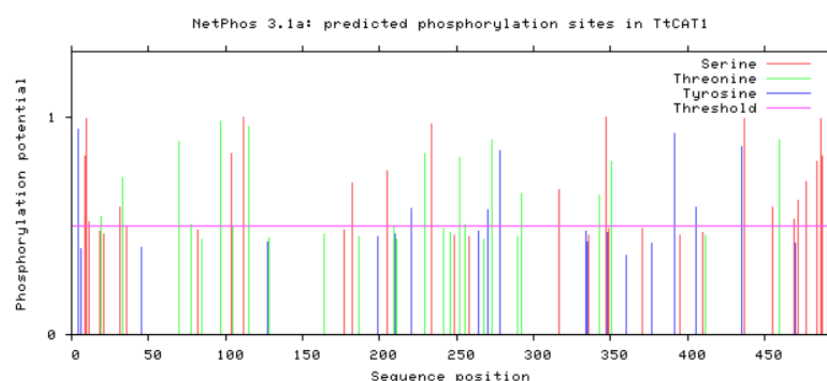

(b)

```
# MDPYKHRPSSSFNSPMWSNAGAPVWNNNSLTVGSRGPILLEDYHLVEK # 50
IADFDRERIPERVVHARGASAKGF FEVTHDVSHLT CADFLRAPGVQTPVI # 100
VRFSTVIHERGSPETLRDPGRFAIKFYTREGNWDLVGNFPVFFIRDMK # 150
FPMVHALKPNPKTHIQENWRILDFFSHPESLHMFTFLFDDIGVPADYR # 200
HMDGSGVNTYTLVNRAGKAHYVKFHWKPTCGVKSLLLEEAVTVGGTNHSH # 250
ATKDLTDSIAAGNYPEWTFYIQTIDPDHEDRFDFDPLDVTWPEDEVVPL # 300
QPVGRLVLRNIDNFFAENEQLAFCPGIIVPGVYSDDKLLQTRIFSYSD # 350
TQRHRLGPNYLLPANAPKCSHHNNHYDGLMNFMRDEEVDYFPSRFDPA # 400
KHAPRYPIPARALNGRREKACIDKENNFQKPGERYRSMQPARQERFINRW # 450
IDALSDPRLTHEIKAIWLSYWSQADKSLGQKLASRLSAKPSM # 500
%1 ...Y...SS...S.....S.T..... # 50
%1 .....S.....T.....T... # 100
%1 ...S.....S.T..... # 150
%1 .....S..... # 200
%1 ...S.....Y.....T...S.....T..... # 250
%1 .T...T.....Y..T.....T... # 300
%1 .....T...S... # 350
%1 T.....Y..... # 400
%1 ...Y.....Y.S..... # 450
%1 ...S...T.....S.S...S.....S.S....
```

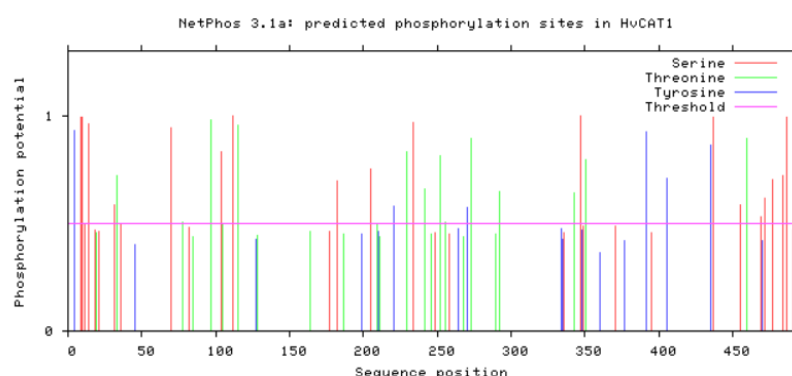

**Figure S3:** Identification of potential phosphorylation sites in (a) TtCAT1 and (b) HvCAT1 proteins using Netphos 3.1 database.

(a)

|                 |                          |        |        |           |
|-----------------|--------------------------|--------|--------|-----------|
| GPS-SNO 1.0     |                          |        |        |           |
| File Tools Help |                          |        |        |           |
| Predicted Sites |                          |        |        |           |
| Position        | Peptide                  | Score  | Cutoff | Cluster   |
| 86              | HDVSHLT <b>C</b> ADFLRAP | 2,011  | 0      | Cluster B |
| 230             | KFWHKPT <b>C</b> GVKSLE  | 19,226 | 0      | Cluster C |
| 325             | ENEQLA <b>F</b> CPGIIVPG | 1,163  | 0      | Cluster B |
| 370             | LPANAPK <b>C</b> SHHNNHY | 1,033  | 0      | Cluster B |

Enter sequence(s) in FASTA format

```
>TtCAT1
MDPYKYRPSSSFNAPMWSTNSGAPVWNNNDNSLTVGSRGPILLEDYHLVEKIADFDRERIPERVWHARGATAKGFEVTHDVSHLTCAFLRAPGVQT
PVIVRFSTVIHERGSPETLRDPRGFAIKFYTRETNWDLVGNFVPVFFIRDMKFPDMVHALKPNPKTHIQENWRILDFSHHPESLHMTFLFDDIGVP
ADYRHMDGSGVNTYTLVNRAGKAHYVKFWKPTCGVKSLEEEAVTVGGTNHSHATKDLTDSIAAGNYPEWTFYIQTIDPDYEERFDPLDVTKTWP
EDVVPVLPQVGRVLNRRNIDNFFSENEQLAFCPGIIVPGVYYSDDKLLQTRIFSYSDTQRHRLGPNYLLLPANAPKCSHHNNHYDGLMFMHRDEEVD
YFSPSRFDPAKHAPRYPIPSRTLNGRREKMVIEKENNFQKQGERYSMDPARQERFINRWIDALSDPRLTHEIKAIWLSYWSQADKSLGQKLASRLSSK
PSM
```

(b)

|                 |                          |        |        |           |
|-----------------|--------------------------|--------|--------|-----------|
| GPS-SNO 1.0     |                          |        |        |           |
| File Tools Help |                          |        |        |           |
| Predicted Sites |                          |        |        |           |
| Position        | Peptide                  | Score  | Cutoff | Cluster   |
| 86              | HDVSHLT <b>C</b> ADFLRAP | 2,011  | 0      | Cluster B |
| 230             | KFWHKPT <b>C</b> GVKSLE  | 19,226 | 0      | Cluster C |
| 325             | ENEQLA <b>F</b> CPGIIVPG | 1,152  | 0      | Cluster B |
| 370             | LPANAPK <b>C</b> SHHNNHY | 1,033  | 0      | Cluster B |
| 421             | NGRREKA <b>C</b> IDKENNF | 0,224  | 0      | Cluster A |

Enter sequence(s) in FASTA format

```
>HvCAT1:
MDPYKHRPSSSFNAPMWSTNSGAPVWNNNDNSLTVGSRGPILLEDYHLVEKIADFDRERIPERVHARGASAKGFEVTHDVSHLTCAFLRAPGV
QTPVIVRFSTVIHERGSPETLRDPRGFAIKFYTRETNWDLVGNFVPVFFIRDMKFPDMVHALKPNPKTHIQENWRVLDFFSHHPESLHMTFLFD
DIGVPADYRHMDGSGVNTYTLVNRAGKAHYVKFWKPTCGVKSLEDEAVTVGGTNHSHATKDLTDSIAAGNYPEWTFYIQTIDPDHEDRFDFDPL
DVTKTWPEDVVPVLPQVGRVLNRRNIDNFFAENEQLAFCPGIIVPGVYYSDDKLLQTRIFSYSDTQRHRLGPNYLLLPANAPKCSHHNNHYDGLMFM
MHRDEEVDYFSPSRFDPAKHAPRYPIPARALNGRREKACIDKENNFQKQGERYSMDPARQERFINRWIDALSDPRLTHEIKAIWLSYWSQADKSL
GQKLASRLSAKPSM
```

**Figure S4:** Identification of putative S-nitrosylation sites in TtCAT1 (a) and HvCAT1 (b) proteins using GPS-NSO.1 database.
